## Original Contribution

# The Association between Obesity and the Prevalence of Low Back Pain in Young Adults

## The Cardiovascular Risk in Young Finns Study

Rahman Shiri<sup>1</sup>, Svetlana Solovieva<sup>1</sup>, Kirsti Husgafvel-Pursiainen<sup>2</sup>, Simo Taimela<sup>3</sup>, Liisa A. Saarikoski<sup>4</sup>, Risto Huupponen<sup>5,6</sup>, Jorma Viikari<sup>7</sup>, Olli T. Raitakari<sup>4,8</sup>, and Eira Viikari-Juntura<sup>1</sup>

<sup>1</sup> Musculoskeletal Disorders Team, Finnish Institute of Occupational Health, Helsinki, Finland.

<sup>2</sup> Biological Mechanisms and Prevention of Work-Related Diseases Team, Finnish Institute of Occupational Health, Helsinki, Finland.

<sup>3</sup> Department of Public Health, University of Helsinki, Helsinki, Finland.

<sup>4</sup> Centre of Applied and Preventive Cardiovascular Medicine, University of Turku, Turku, Finland.

<sup>5</sup> Department of Pharmacology, Drug Development and Therapeutics, University of Turku, Turku, Finland.

<sup>6</sup> Tykslab, Clinical Pharmacology, Hospital District of Southwest Finland, Turku, Finland.

<sup>7</sup> Department of Medicine, University of Turku, Turku, Finland.

<sup>8</sup> Department of Clinical Physiology, University of Turku, Turku, Finland.

Received for publication July 9, 2007; accepted for publication January 7, 2008.

Both low back pain (LBP) and obesity are common public health problems, yet their relation remains controversial. The aim of this study was to investigate the associations between weight-related factors and the prevalence of LBP in young adults in Finland. Participants in the ongoing Cardiovascular Risk in Young Finns Study aged 24–39 years were included ( $N = 2,575$ ). In 2001, 31.2% of men and 39.5% of women reported LBP with recovery within a month or recurrent or continuous pain during the preceding 12 months. For women only, those with higher body mass index, waist circumference, hip circumference, waist-to-hip ratio, serum leptin level, and C-reactive protein level showed an increased prevalence of LBP. With all weight-related factors in the model, only waist circumference was related to LBP in women. For women, the odds ratios of LBP were 1.2 (95% confidence interval: 0.8, 1.8) for a waist circumference of 80–87.9 cm and 1.8 (95% confidence interval: 1.0, 3.2) for a waist circumference of  $\geq 88$  cm compared with a waist circumference of  $< 80$  cm. This association was independent of C-reactive protein, leptin, and adiponectin levels. The authors' findings in a relatively young population suggest that abdominal obesity may increase the risk of LBP in women.

adiponectin; C-reactive protein; leptin, overweight

Abbreviations: BMI, body mass index; LBP, low back pain.

Low back pain (LBP) is a common health problem (1) that leads to sick leave (2), disability (3), and loss of worker productivity (4). The prevalence of LBP is higher in women than in men (5, 6). Most patients with acute LBP improve within a month (7). Further improvement occurs up to 3

months. However, low level of pain will often persist, and the majority of those affected will have at least one recurrence within a year (7).

Obesity is a worldwide health problem leading to a range of adverse health consequences (8). Previous studies on the

Correspondence to Dr. Rahman Shiri, Musculoskeletal Disorders Team, Finnish Institute of Occupational Health, Topeliuksenkatu 41 a A, 00250 Helsinki, Finland (e-mail: rahman.shiri@ttl.fi).

associations between weight-related factors and LBP have yielded inconsistent findings (9). Some have reported an association between obesity and LBP (1, 10, 11), but this association has not been confirmed by others (12, 13). The association between obesity and LBP has been reported to be stronger among women than among men (10, 11, 14, 15).

So far, the mechanisms underlying the association between obesity and LBP are not fully known. Obesity may increase the risk of LBP, for example, because of lumbar disc disorders (16–18), through mechanical load. It has been suggested that mechanical load is the principal factor initiating the degenerative process in the lumbar spine (19). In addition to mechanical load, obesity may cause LBP via low-grade systemic inflammation (16–18, 20, 21). It is well known that adipose tissue is metabolically active and produces adipokines as well as pro- and antiinflammatory cytokines (22). Leptin, in addition to affecting energy balance, stimulates the synthesis of proinflammatory cytokines and nitric oxide; that is, it is directly linked to pain modulation. Moreover, experimental studies on animals suggest that leptin may increase pain sensitivity (23). An association between C-reactive protein—a marker of systemic inflammation—and sciatica has been shown in a few case-control studies (24), whereas studies on the association between C-reactive protein and LBP are sparser (25). It would be particularly valuable to address the association between obesity and LBP in relation to inflammatory factors in a population-based study.

The aim of this study was to investigate the associations between weight-related factors and the prevalence of LBP in a young adult population, taking into account metabolic and inflammatory activities of adipose tissue.

## MATERIALS AND METHODS

### Population

This study is part of the Cardiovascular Risk in Young Finns Study, an ongoing follow-up study of atherosclerosis risk factors and precursors from childhood to adulthood (26–28). Briefly, children and adolescents aged 3, 6, 9, 12, 15, or 18 years ( $N = 4,320$ ) were invited to participate in the first cross-sectional study in 1980; 3,596 (83.2 percent) participated. The study was carried out in five Finnish university cities (Helsinki, Kuopio, Oulu, Tampere, and Turku) and their surrounding municipalities. Equal numbers of men and women were randomly chosen from each center (27). Those subjects who participated in 1980 ( $n = 3,596$ ) were invited to later examinations. The follow-up studies were carried out in 1983, 1986, and 2001 in all five centers. A total of 2,991 subjects (83.2 percent) participated in 1983, 2,799 (78.3 percent) in 1986, and 2,620 (76 percent) in 2001.

This study on weight-related factors and LBP was designed as cross-sectional by using data collected in 2001, with historical data on weight-related variables. Questions on LBP were included to explore the association of low back disorders with cardiovascular risk factors. Subjects ( $N = 2,575$ ) for whom information on LBP was available in 2001 were included in this study. We excluded pregnant

women ( $n = 60$ ) from all analyses except for the prevalence estimate of LBP.

### Outcome

The case definition of LBP was created from responses to two separate questions. First, “Have you had low back trouble (pain, ache, unpleasant sensations) during the preceding 12 months?” A manikin was used to denote the anatomic area, and the alternative responses were no and yes. If the answer was yes, a second question was asked regarding tendency and speed of recovery: “If you had low back trouble during the preceding 12 months, did it subside entirely?” The alternative responses were 1) “Yes, in less than a week” (i.e., recovered within a week); 2) “Yes, in less than a month” (i.e., recovered within a month); 3) “No, I have recurrent low back trouble”; and 4) “No, I have continuous low back trouble.” In this paper, LBP, ache, and unpleasant sensation are collectively referred to as LBP.

In this study, we used a dichotomous variable of LBP as the outcome. Those who recovered within a month or had recurrent or continuous LBP were compared with those who had no pain or those who recovered within a week. Those with no pain or those who recovered from pain within a week were chosen as the reference group because subjects with LBP who recover quickly are often nonsymptomatic or have mild pain only (29). Moreover, the use of a dichotomous outcome gave us higher power in the study.

### Determinants

**Weight-related factors in youth.** Birth weight was asked via questionnaire in 1983 and was checked by using the well-baby clinics record cards. We grouped birth weight into three levels: low,  $<2,500$  g; normal,  $2,500$ – $4,000$  g; or high,  $>4,000$  g (30). Age- and gender-specific international cutoff points for body mass index (BMI) (31) were used for 1980 and 1986 data to define overweight and obesity in subjects aged 3–15 years. For subjects aged 18–24 years, BMI was categorized as described in the section below. Subscapular, biceps, and triceps skinfold thickness for 1986 data were divided into three gender-specific, equally sized groups by use of the tertile method.

**Weight-related factors in 2001.** As part of the health examination, body weight and height and waist and hip circumferences were measured. Weight was measured in light clothes without shoes with a digital scale, with an accuracy of 0.1 kg, and height was measured with a wall-mounted stadiometer with an accuracy of 0.5 cm. BMI was calculated for all subjects (aged 24–36 years), and overweight was defined as  $25.0$ – $29.9$   $\text{kg/m}^2$ , obesity as  $30.0$ – $34.9$   $\text{kg/m}^2$ , and severe obesity as greater than or equal to  $35.0$   $\text{kg/m}^2$  (32, 33). Waist circumference was classified into one of three groups:  $<94$ ,  $94$ – $101.9$ , and  $\geq 102$  cm for men and  $<80$ ,  $80$ – $87.9$ , and  $\geq 88.0$  cm for women (32, 33). Hip circumference was classified into three gender-specific, equally sized groups by using the tertile method. In addition, the waist-to-hip ratio was computed and was classified into one of three levels:  $<0.9$ ,  $0.9$ – $1.0$ , and  $>1.0$  for men and  $<0.8$ ,  $0.8$ – $0.9$ , and  $>0.9$  for women (34).

**TABLE 1. Background characteristics of subjects in the Cardiovascular Risk in Young Finns Study, Finland, 2001**

| Characteristic                       | Men   |                          | Women |                         |
|--------------------------------------|-------|--------------------------|-------|-------------------------|
|                                      | No.*  | Proportion or mean (SD)† | No.*  | Proportion or mean (SD) |
| Age in years (%)                     |       |                          |       |                         |
| 24                                   | 187   | 16.2                     | 206   | 15.2                    |
| 27                                   | 176   | 15.2                     | 230   | 16.9                    |
| 30                                   | 211   | 18.2                     | 225   | 16.6                    |
| 33                                   | 203   | 17.6                     | 249   | 18.3                    |
| 36                                   | 206   | 17.8                     | 243   | 17.9                    |
| 39                                   | 174   | 15.0                     | 205   | 15.1                    |
| Socioeconomic status (%)             |       |                          |       |                         |
| Employers and own-account workers    | 99    | 10.0                     | 71    | 5.9                     |
| Upper-level white-collar workers     | 270   | 27.2                     | 217   | 18.0                    |
| Lower-level white-collar workers     | 184   | 18.5                     | 607   | 50.4                    |
| Blue-collar workers                  | 433   | 43.7                     | 286   | 23.8                    |
| Others                               | 6     | 0.6                      | 23    | 1.9                     |
| Body mass index (kg/m <sup>2</sup> ) | 1,010 | 25.7 (4.1)               | 1,172 | 24.5 (4.6)              |
| Waist circumference (cm)             | 979   | 90.0 (10.9)              | 1,153 | 79.3 (11.4)             |
| Hip circumference (cm)               | 980   | 100.0 (7.3)              | 1,149 | 99.8 (9.1)              |
| C-reactive protein (mg/liter)        | 1,010 | 1.5 (3.3)                | 1,176 | 2.2 (4.3)               |
| Leptin (ng/ml)                       | 1,008 | 5.4 (4.3)                | 1,174 | 15.4 (10.0)             |
| Adiponectin (μg/ml)                  | 1,009 | 7.4 (3.3)                | 1,174 | 11.0 (4.4)              |
| Smoking (%)                          |       |                          |       |                         |
| Nonsmokers                           | 715   | 63.5                     | 1,001 | 75.3                    |
| Smokers                              | 411   | 36.5                     | 328   | 24.7                    |
| Leisure-time physical activity (%)   |       |                          |       |                         |
| Once a month or less                 | 330   | 29.0                     | 304   | 22.8                    |
| Once a week                          | 319   | 28.0                     | 386   | 28.9                    |
| 2–3 times a week                     | 348   | 30.5                     | 464   | 34.8                    |
| ≥4 times a week                      | 143   | 12.5                     | 180   | 13.5                    |

\* Number of subjects with a measurement.

† SD, standard deviation.

**Other determinants in 2001.** A self-administered questionnaire elicited information on occupational title, leisure-time physical activity, smoking, and number of deliveries. Radioimmunoassay was used to measure concentrations of serum adiponectin (Human Adiponectin RIA kit; Linco Research, St. Charles, Missouri) and leptin (Human Leptin RIA kit; Linco Research). Plasma high-sensitive C-reactive protein was also measured (35).

Occupational titles were grouped into nine categories by using the classification of socioeconomic status from the Central Statistical Office of Finland (1979) and were further grouped into five categories: employers or own-account workers; upper-level administrative, managerial, and professional workers; lower-level employees with administrative and clerical occupations; manual workers; and others (retired, unemployed, students, voluntary workers). Those

who smoked at least once a week or more frequently were classified as smokers. Physical activity was assessed by a single global question: "How often do you exercise so that you are short of breath or sweating?" There were six alternative answers: never, once a month, once a week, two to three times a week, four to six times a week, and daily. The variable was further categorized into four classes: once a month or less (categories 1 and 2), once a week (category 3), two to three times a week (category 4), and at least four times a week (categories 5 and 6). Geographic region was defined as western (Helsinki, Turku, Tampere) or eastern (Kuopio and Oulu) (36).

High sensitive C-reactive protein was dichotomized into two groups, ≤3 mg/liter or >3 mg/liter, according to a recommended cutoff point for high risk of cardiovascular disease (37). Leptin and adiponectin levels were grouped into

**TABLE 2. Prevalence of low back pain in men and women during the preceding 12 months, the Cardiovascular Risk in Young Finns Study, Finland, 2001**

| Low back pain            | Men (n = 1,157) |      | Women (n = 1,418) |      |
|--------------------------|-----------------|------|-------------------|------|
|                          | No.             | %    | No.               | %    |
| None                     | 446             | 38.6 | 422               | 29.8 |
| Recovered within a week  | 350             | 30.2 | 436               | 30.7 |
| Recovered within a month | 103             | 8.9  | 154               | 10.9 |
| Recurrent low back pain  | 220             | 19.0 | 335               | 23.6 |
| Continuous low back pain | 38              | 3.3  | 71                | 5.0  |

three gender-specific, equally sized levels by use of the tertile method. In addition, for analyses of interaction, we dichotomized leptin and adiponectin at the median level within gender.

### Statistical analysis

Logistic regression was used for the multivariable analyses with the aforementioned dichotomous outcome. Subjects' age, socioeconomic status, and smoking (dichotomized) were included in the multivariable models as covariates. Tests for trend (linearity) were conducted with logistic regression by including age or weight-related factors as continuous variables in the models. To assess associations between overweight over time and LBP, we combined data on BMI from different data collection periods and grouped them into five categories, using nonoverweight at all data collection periods as the reference category. Interactions between waist circumference and C-reactive protein, waist circumference and leptin, and waist circumference and adiponectin were investigated by stratification and by logistic regression analysis. In all analyses, the alpha level for statistical significance was set at  $p < 0.05$ . All analyses were performed by using Stata version 8.2 software (Stata Corporation, College Station, Texas).

## RESULTS

Nonresponders to the 2001 survey were somewhat younger than responders (mean age, 31.2 years (standard deviation, 5) vs. 31.5 years (standard deviation, 5),  $p = 0.057$ ). In addition, they were more often men (60.5 percent vs. 44.8 percent,  $p < 0.001$ ). No differences were found regarding geographic region, family income, or BMI in 1980.

We found no major differences in the proportions of men (46 percent) and women (54 percent) or the size of age groups in the study population (table 1). More men than women were manual workers, whereas lower-level white-collar occupations dominated among women. Compared with women, men had higher BMI and waist circumferences but showed no difference in hip circumference. Men had lower levels of C-reactive protein, leptin, and adiponectin and were more often smokers and less physically active.

Table 2 presents the prevalence of LBP by gender. Among the men, 31.2 percent and, among the women, 39.5 percent

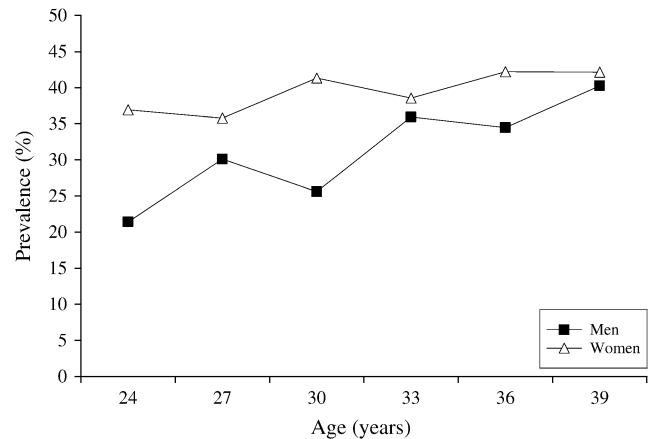

**FIGURE 1.** Prevalence of low back pain with recovery within a month or recurrent or continuous pain during the preceding 12 months, by age and gender, the Cardiovascular Risk in Young Finns Study, Finland, 2001. The difference in the prevalence of low back pain between men and women was statistically significant at ages 24 and 30 years only.

reported LBP with recovery within a month or recurrent or continuous pain during the preceding 12 months. There was an increase in LBP with age among men ( $p$  for trend  $< 0.0001$ ) but not among women ( $p$  for trend = 0.11) (figure 1).

### Weight-related factors

Current (measured in 2001) BMI, waist circumference, hip circumference, and waist-to-hip ratio were associated with LBP with recovery within a month or recurrent or continuous pain during the preceding 12 months for women only (table 3). The associations were statistically significant for only those with a BMI of  $\geq 35.0$  kg/m<sup>2</sup>, with a waist circumference of  $\geq 88.0$  cm, in the third tertile of hip circumference, or with a waist-to-hip ratio of  $> 0.9$ . With all weight-related parameters in the model, only that association between waist circumference and LBP remained statistically significant (table 4).

The association between waist circumference and LBP was modified by age (figure 2). Women in the age groups 24 and 27 years whose waist circumference was  $\geq 80$  cm had a higher prevalence of LBP compared with those whose waist circumference was  $< 80$  cm ( $p = 0.004$ ). For women aged 30 years ( $n = 190$ ), the prevalence of LBP was high among only those ( $n = 37$ ) whose waist circumference was  $\geq 88$  cm ( $p < 0.001$ ). An increased prevalence of LBP among those whose waist circumference was  $\geq 88$  cm was independent of history of delivery (adjusted odds ratio = 1.8, 95 percent confidence interval: 1.1, 3.1 for subjects with no history of delivery and odds ratio = 1.8, 95 percent confidence interval: 1.2, 2.7 for subjects with a history of delivery). The marked increase in the prevalence of LBP

**TABLE 3. Sex-specific, adjusted odds ratios of low back pain,\* by current (2001) and youth (1980 and 1986) weight-related factors (N = 1,429–2,137), the Cardiovascular Risk in Young Finns Study, Finland**

| Characteristic                        | Men |              |       |          |             | Women |              |     |          |             |
|---------------------------------------|-----|--------------|-------|----------|-------------|-------|--------------|-----|----------|-------------|
|                                       | No. | No. of cases | OR†,‡ | 95% CI†  | p for trend | No.   | No. of cases | OR‡ | 95% CI   | p for trend |
| <i>Weight-related factors in 2001</i> |     |              |       |          |             |       |              |     |          |             |
| Body mass index (kg/m <sup>2</sup> )  |     |              |       |          |             |       |              |     |          |             |
| <25.0                                 | 481 | 158          | 1     |          |             | 759   | 272          | 1   |          |             |
| 25.0–29.9                             | 397 | 121          | 0.8   | 0.6, 1.1 |             | 280   | 116          | 1.2 | 0.8, 1.6 |             |
| 30.0–34.9                             | 104 | 36           | 0.9   | 0.5, 1.4 |             | 92    | 43           | 1.4 | 0.9, 2.3 |             |
| ≥35.0                                 | 28  | 8            | 0.5   | 0.2, 1.4 | 0.11        | 41    | 26           | 3.1 | 1.5, 6.5 | 0.002       |
| Waist circumference (cm)              |     |              |       |          |             |       |              |     |          |             |
| <94.0                                 | 664 | 211          | 1     |          |             |       |              |     |          |             |
| 94.0–101.9                            | 174 | 59           | 1.1   | 0.7, 1.6 |             |       |              |     |          |             |
| ≥102.0                                | 141 | 41           | 0.7   | 0.4, 1.1 | 0.16        |       |              |     |          |             |
| Waist circumference (cm)              |     |              |       |          |             |       |              |     |          |             |
| <80.0                                 |     |              |       |          |             | 701   | 243          | 1   |          |             |
| 80.0–87.9                             |     |              |       |          |             | 222   | 92           | 1.3 | 0.9, 1.8 |             |
| ≥88.0                                 |     |              |       |          |             | 230   | 117          | 1.8 | 1.3, 2.4 | <0.001      |
| Hip circumference (tertile)           |     |              |       |          |             |       |              |     |          |             |
| First                                 | 285 | 90           | 1     |          |             | 350   | 122          | 1   |          |             |
| Second                                | 362 | 128          | 1.3   | 0.9, 1.9 |             | 399   | 140          | 1.0 | 0.7, 1.4 |             |
| Third                                 | 333 | 94           | 1.0   | 0.6, 1.4 | 0.85        | 400   | 188          | 1.6 | 1.1, 2.1 | 0.005       |
| Waist-to-hip ratio                    |     |              |       |          |             |       |              |     |          |             |
| <0.9                                  | 522 | 156          | 1     |          |             |       |              |     |          |             |
| 0.9–1.0                               | 406 | 138          | 0.9   | 0.6, 1.3 |             |       |              |     |          |             |
| >1.0                                  | 51  | 17           | 0.9   | 0.5, 1.8 | 0.60        |       |              |     |          |             |
| Waist-to-hip ratio                    |     |              |       |          |             |       |              |     |          |             |
| <0.8                                  |     |              |       |          |             | 680   | 246          | 1   |          |             |
| 0.8–0.9                               |     |              |       |          |             | 396   | 162          | 1.2 | 0.8, 1.5 |             |
| >0.9                                  |     |              |       |          |             | 73    | 42           | 2.3 | 1.3, 3.9 | 0.009       |
| Leptin (tertile)                      |     |              |       |          |             |       |              |     |          |             |
| First                                 | 320 | 98           | 1     |          |             | 391   | 126          | 1   |          |             |
| Second                                | 338 | 120          | 1.4   | 0.9, 2.0 |             | 390   | 158          | 1.5 | 1.1, 2.0 |             |
| Third                                 | 350 | 101          | 0.9   | 0.6, 1.3 | 0.53        | 393   | 174          | 1.6 | 1.2, 2.2 | 0.003       |
| Adiponectin (tertile)                 |     |              |       |          |             |       |              |     |          |             |
| First (lowest)                        | 332 | 109          | 1     |          |             | 385   | 162          | 1   |          |             |
| Second                                | 333 | 97           | 0.8   | 0.6, 1.2 |             | 394   | 153          | 0.9 | 0.6, 1.2 |             |
| Third (highest)                       | 344 | 113          | 1.1   | 0.7, 1.5 | 0.71        | 395   | 143          | 0.8 | 0.6, 1.1 | 0.11        |
| High-sensitive C-reactive protein     |     |              |       |          |             |       |              |     |          |             |
| ≤3                                    | 911 | 285          | 1     |          |             | 969   | 362          | 1   |          |             |
| >3                                    | 99  | 35           | 1.0   | 0.6, 1.7 | 0.98        | 207   | 96           | 1.4 | 1.0, 2.0 | 0.027       |

Table continues

was also seen among obese women aged 30 years when waist-to-hip ratio or BMI was used as an indicator of obesity (data not shown). For men, no statistically significant associations were found between waist circumference and LBP in any age group.

Men who had been overweight in youth (1980 and 1986) had a lower prevalence of LBP compared with non-overweight subjects, while there was an opposite trend for women. The risk estimates for overweight and obesity in women showed a dose-response pattern, although it

TABLE 3. Continued

| Characteristic                                   | Men   |              |     |           |             | Women |              |     |          |             |
|--------------------------------------------------|-------|--------------|-----|-----------|-------------|-------|--------------|-----|----------|-------------|
|                                                  | No.   | No. of cases | OR† | 95% CI    | p for trend | No.   | No. of cases | OR† | 95% CI   | p for trend |
| <i>Weight-related factors in youth</i>           |       |              |     |           |             |       |              |     |          |             |
| Birth weight (g)                                 |       |              |     |           |             |       |              |     |          |             |
| <2,500                                           | 37    | 7            | 0.6 | 0.2, 1.4  |             | 42    | 16           | 1.1 | 0.5, 2.1 |             |
| 2,500–4,000                                      | 415   | 129          | 1   |           |             | 597   | 238          | 1   |          |             |
| >4,000                                           | 516   | 157          | 1.1 | 0.8, 1.5  | 0.46        | 501   | 208          | 1.0 | 0.8, 1.4 | 0.76        |
| Body mass index in 1980                          |       |              |     |           |             |       |              |     |          |             |
| Normal                                           | 1,047 | 336          | 1   |           |             | 1,245 | 478          | 1   |          |             |
| Overweight                                       | 82    | 16           | 0.5 | 0.2, 0.9  |             | 93    | 41           | 1.2 | 0.7, 1.9 |             |
| Obese                                            | 18    | 7            | 1.0 | 0.3, 3.1  | 0.08        | 14    | 8            | 2.4 | 0.7, 7.6 | 0.11        |
| Body mass index in 1986                          |       |              |     |           |             |       |              |     |          |             |
| Normal                                           | 761   | 236          | 1   |           |             | 907   | 355          | 1   |          |             |
| Overweight                                       | 95    | 22           | 0.6 | 0.3, 0.99 |             | 105   | 44           | 1.1 | 0.7, 1.7 |             |
| Obese                                            | 18    | 5            | 0.3 | 0.1, 1.4  | 0.01        | 17    | 11           | 2.4 | 0.8, 6.7 | 0.17        |
| Subscapular skinfold thickness in 1986 (tertile) |       |              |     |           |             |       |              |     |          |             |
| First                                            | 270   | 72           | 1   |           |             | 338   | 120          | 1   |          |             |
| Second                                           | 299   | 92           | 0.9 | 0.6, 1.5  |             | 338   | 145          | 1.2 | 0.8, 1.7 |             |
| Third                                            | 306   | 99           | 0.9 | 0.5, 1.4  | 0.51        | 349   | 142          | 1.0 | 0.7, 1.5 | 0.95        |
| Biceps skinfold thickness in 1986 (tertile)      |       |              |     |           |             |       |              |     |          |             |
| First                                            | 283   | 87           | 1   |           |             | 335   | 125          | 1   |          |             |
| Second                                           | 310   | 100          | 1.1 | 0.8, 1.7  |             | 339   | 141          | 1.2 | 0.8, 1.7 |             |
| Third                                            | 282   | 76           | 0.8 | 0.5, 1.3  | 0.44        | 355   | 144          | 1.1 | 0.7, 1.5 | 0.74        |
| Triceps skinfold thickness in 1986 (tertile)     |       |              |     |           |             |       |              |     |          |             |
| First                                            | 291   | 85           | 1   |           |             | 341   | 128          | 1   |          |             |
| Second                                           | 297   | 102          | 1.2 | 0.8, 1.7  |             | 338   | 141          | 1.1 | 0.8, 1.6 |             |
| Third                                            | 283   | 74           | 0.8 | 0.5, 1.2  | 0.32        | 350   | 141          | 1.0 | 0.7, 1.4 | 0.80        |
| <i>2001 and youth body mass index</i>            |       |              |     |           |             |       |              |     |          |             |
| Normal weight in 1980, 1986, and 2001            | 367   | 123          | 1   |           |             | 555   | 205          | 1   |          |             |
| Overweight only in 1980 and/or 1986              | 12    | 2            | 0.5 | 0.1, 2.5  |             | 26    | 8            | 0.9 | 0.4, 2.2 |             |
| Overweight only in 2001                          | 284   | 85           | 0.8 | 0.5, 1.1  |             | 217   | 92           | 1.1 | 0.7, 1.5 |             |
| Overweight in 1980 or 1986 and 2001              | 69    | 19           | 0.6 | 0.3, 1.1  |             | 66    | 30           | 1.3 | 0.7, 2.3 |             |
| Overweight in 1980 and 1986 and 2001             | 38    | 7            | 0.2 | 0.1, 0.7  | 0.004       | 37    | 21           | 1.7 | 0.8, 3.5 | 0.15        |

\* Subjects who recovered within a month or had recurrent or continuous low back pain during the preceding 12 months compared with those with no pain or who recovered within a week.

† OR, odds ratio; CI, confidence interval.

‡ Adjusted for age, socioeconomic status, and smoking.

was not statistically significant. Birth weight or subscapular, biceps, or triceps skinfold thickness measures in 1986 were not associated with LBP in either gender (table 3).

Compared with subjects whose BMI was normal in 1980, 1986, and 2001, women who were overweight in all three surveys had a marginally increased prevalence of LBP.

However, overweight men had a lower prevalence of LBP (table 3).

#### Waist circumference and leptin and adiponectin levels

Leptin concentration correlated highly with waist circumference in both men and women (correlation coefficient =

**TABLE 4. Sex-specific, adjusted odds ratios of low back pain,\* by all weight-related factors in the model, the Cardiovascular Risk in Young Finns Study, Finland, 2001**

| Weight-related factor                | Men   |          |                    | Women |          |                    |
|--------------------------------------|-------|----------|--------------------|-------|----------|--------------------|
|                                      | OR†,‡ | 95% CI†  | <i>p</i> for trend | OR‡   | 95% CI   | <i>p</i> for trend |
| Body mass index (kg/m <sup>2</sup> ) |       |          |                    |       |          |                    |
| <25.0                                | 1     |          |                    | 1     |          |                    |
| 25.0–29.9                            | 0.7   | 0.4, 1.1 |                    | 0.7   | 0.4, 1.2 |                    |
| ≥30.0                                | 0.8   | 0.3, 1.9 | 0.27               | 0.9   | 0.4, 1.7 | 0.65               |
| Waist circumference (cm)             |       |          |                    |       |          |                    |
| <94.0                                | 1     |          |                    |       |          |                    |
| 94.0–101.9                           | 1.1   | 0.6, 1.7 |                    |       |          |                    |
| ≥102.0                               | 0.7   | 0.4, 1.7 | 0.49               |       |          |                    |
| Waist circumference (cm)             |       |          |                    |       |          |                    |
| <80.0                                |       |          |                    | 1     |          |                    |
| 80.0–87.9                            |       |          |                    | 1.2   | 0.8, 1.8 |                    |
| ≥88.0                                |       |          |                    | 1.8   | 1.0, 3.2 | 0.05               |
| Hip circumference (tertile)          |       |          |                    |       |          |                    |
| First                                | 1     |          |                    | 1     |          |                    |
| Second                               | 1.5   | 0.9, 2.2 |                    | 1.0   | 0.7, 1.3 |                    |
| Third                                | 1.4   | 0.7, 2.4 | 0.19               | 1.3   | 0.8, 2.0 | 0.43               |

\* Subjects who recovered within a month or had recurrent or continuous low back pain during the preceding 12 months compared with those with no pain or who recovered within a week.

† OR, odds ratio; CI, confidence interval.

‡ Adjusted for age, socioeconomic status, smoking, and each other.

0.73,  $p < 0.001$  for men and correlation coefficient = 0.71,  $p < 0.001$  for women). As expected, adiponectin level decreased with an increase in waist circumference (correlation coefficient =  $-0.24$ ,  $p < 0.001$  for men and correlation coefficient =  $-0.34$ ,  $p < 0.001$  for women). The prevalence of LBP increased with increasing serum leptin level in women (table 3). Adiponectin was not associated with LBP in either gender. The association between waist circumference and LBP was independent of leptin level (table 5).

We found no interaction between waist circumference and adiponectin level in relation to LBP.

### Waist circumference and C-reactive protein

C-reactive protein was associated with LBP in women only (table 3). C-reactive protein level and waist circumference were associated in both men and women ( $p < 0.001$  for both). Separate and joint effects of waist circumference and C-reactive protein on LBP are shown in table 5. For women, the association between waist circumference and LBP was independent of C-reactive protein. For women with a normal waist circumference, high C-reactive protein was related to increased prevalence of LBP (odds ratio = 1.5); however, the estimate was not statistically significant.

### DISCUSSION

We studied several weight-related factors, adipokines, and the inflammatory marker C-reactive protein in relation to LBP in a representative young population sample. Our findings showed that obesity is associated with LBP in women but not in men. Of weight-related factors, waist circumference was the strongest determinant of LBP in women. This association was independent of C-reactive protein, leptin, and adiponectin levels.

In line with earlier studies, women had a higher prevalence of LBP compared with men (5, 6). We found this difference to be largest in the youngest age group and to diminish toward middle age. Other studies have reported a steeper increase in LBP for girls than boys already in puberty, and it has been associated with hormonal changes, irregular or prolonged menstrual cycle, and different pain perception and recall of symptoms (38–40).

Waist circumference and BMI measure different aspects of obesity. Waist circumference is a strong predictor of both visceral and subcutaneous adipose tissues (41). Thus, waist circumference is a better measure of abdominal obesity; BMI captures body fat as well as lean body mass and does not reflect distribution of body fat (42). Leptin, an adipokine produced by adipose tissue, was strongly associated with waist circumference but did not add to the risk of LBP for those with a large waist circumference. Adiponectin, another adipokine, was not related to LBP. In agreement with

another population-based study (43), our findings suggest that abdominal obesity is the primary weight-related risk factor for LBP. Obesity may exert its effects on LBP via mechanical stress, metabolic or inflammatory pathways, or their interplay.

We found abdominal obesity to be associated with LBP in women. Those with a large waist circumference had a higher prevalence of LBP in most but not all age groups. This finding could be due to changes in the proportions of visceral and subcutaneous fat at different ages. It can also be due to fluctuation in data or unmeasured confounding. Abdominal obesity was not associated with LBP in men.

The associations between BMI and LBP differed between men and women. Persistent overweight was associated with a lower prevalence of LBP in men, but no association was found for women. The gender-related differences in the association of overweight or obesity defined by BMI with LBP could be related to the differences in the distribution of body fat mass or to the proportion of lean body mass, known to be larger in younger people (42) than in older people. The lower prevalence of LBP in young men with a high BMI in our study may be due to increased muscle mass. In fact, extremely high BMI has been associated with LBP in men in other studies (44). Our sample size was too small to study the effects of persistent obesity in men. In all, the capacity of BMI to reflect adiposity harmful to the health of the low back may be limited in the same way as has been observed for other health outcomes (42).

In agreement with earlier findings (34), we found an increase in C-reactive protein level with increasing waist circumference in both genders. The association between C-reactive protein and LBP was moderate and became non-significant after controlling for waist circumference. Adipose tissue produces several proinflammatory cytokines (e.g., tumor necrosis factor- $\alpha$ , interleukin-6) that increase the release of C-reactive protein. C-reactive protein is, however, stimulated by a variety of determinants (45) and is therefore a nonspecific marker of inflammatory effects of adipose tissue. Moreover, subjects with LBP may have different types of pain—for example, sciatic pain, lumbago—and some types may have a stronger inflammatory component than others. In an additional analysis (data not shown), we used the original LBP question to compare the distributions of speed of recovery. Women with a normal waist circumference and high C-reactive protein level tended to more often report continuous LBP than those with low C-reactive protein levels, suggesting different underlying pathology.

Characterization of LBP includes frequency, intensity, and duration of pain and associated loss of productivity and disability, with fluctuations over time (29). With data on recovery and chronicity but not on severity of LBP, our aim was to address clinically significant LBP. Therefore, we included in the reference category subjects with LBP who recovered within a week. Additional analyses with only nonsymptomatic subjects in the reference category produced similar findings (data not shown).

We adjusted the obtained odds ratios for common known risk factors for LBP, for example, socioeconomic status,

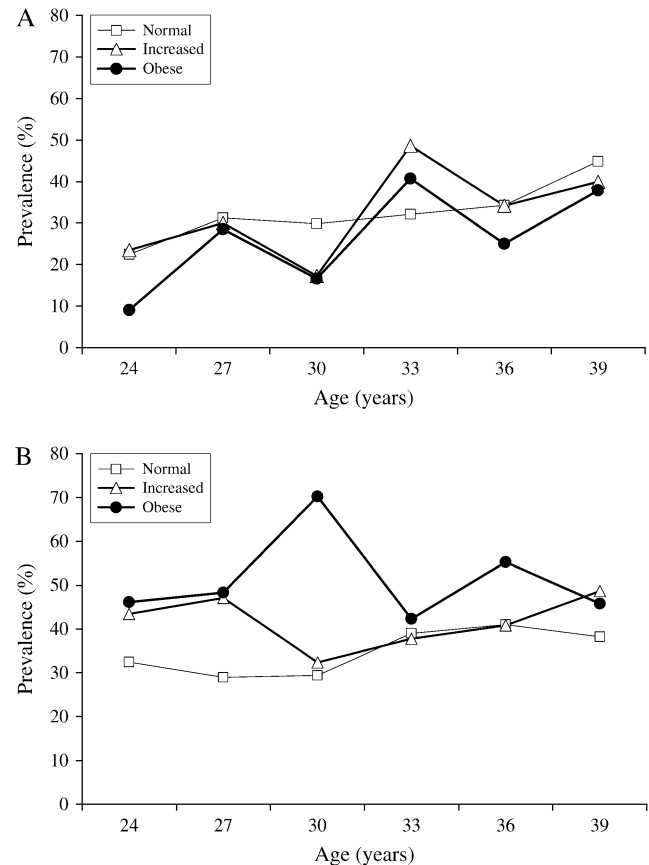

**FIGURE 2.** Prevalence of low back pain with recovery within a month or recurrent or continuous pain during the preceding 12 months, by age, gender (A, men; B, women), and waist circumference, the Cardiovascular Risk in Young Finns Study, Finland, 2001. Pregnant women ( $n = 60$ ) were excluded. Normal, waist circumference  $<94$  cm for men and  $<80$  cm for women; increased, waist circumference 94–101.9 cm for men and 80–87.9 cm for women; obese, waist circumference  $\geq 102$  cm for men and  $\geq 88$  cm for women.

occupational class, and smoking. Leisure-time physical activity was not associated with weight-related factors or LBP and therefore was not adjusted for in the analysis. The observed associations in our study are less likely due to confounding by these factors. However, the observed associations may have been affected by psychological and psychosocial factors (5).

In summary, we found current or persistent obesity, and especially abdominal obesity, to be associated with LBP in relatively young women but not in men. The studied indicators of adipose tissue activity did not add to the effects of abdominal adiposity. Future analyses focusing on relations between LBP and weight-related factors, known risk factors for atherosclerosis, and gene-environment interactions in a population of relatively young adults with a smaller burden of other age-related diseases, such as the present material, would be valuable in widening our understanding of underlying etiologies and mechanisms.



**TABLE 5. Separate and joint effects of increased waist circumference and leptin (dichotomized at the median level within gender) and increased waist circumference and C-reactive protein on low back pain,\* the Cardiovascular Risk in Young Finns Study, Finland, 2001**

|                          |                    | Men |              |                    |                     | Women |              |                 |          |
|--------------------------|--------------------|-----|--------------|--------------------|---------------------|-------|--------------|-----------------|----------|
|                          |                    | No. | No. of cases | OR <sup>‡</sup> ,§ | 95% CI <sup>‡</sup> | No.   | No. of cases | OR <sup>§</sup> | 95% CI   |
| Leptin level             |                    |     |              |                    |                     |       |              |                 |          |
| Low                      | Normal             | 348 | 142          | 1                  |                     | 492   | 167          | 1               |          |
| High                     | Normal             | 211 | 65           | 1.1                | 0.7, 1.6            | 204   | 75           | 1.2             | 0.8, 1.8 |
| Low                      | Increased or obese | 35  | 16           | 1.4                | 0.7, 3.0            | 81    | 37           | 1.7             | 1.0, 2.9 |
| High                     | Increased or obese | 278 | 83           | 0.8                | 0.6, 1.2            | 371   | 172          | 1.6             | 1.2, 2.1 |
| C-reactive protein level |                    |     |              |                    |                     |       |              |                 |          |
| Low                      | Normal             | 620 | 194          | 1                  |                     | 626   | 212          | 1               |          |
| High                     | Normal             | 40  | 14           | 0.9                | 0.4, 2.1            | 72    | 30           | 1.5             | 0.9, 2.6 |
| Low                      | Increased          | 151 | 50           | 1.1                | 0.6, 1.7            | 180   | 74           | 1.3             | 0.9, 1.9 |
| High                     | Increased          | 22  | 8            | 0.9                | 0.3, 2.7            | 42    | 18           | 1.3             | 0.6, 2.6 |
| Low                      | Obese              | 108 | 30           | 0.6                | 0.3, 1.1            | 141   | 72           | 1.8             | 1.1, 2.7 |
| High                     | Obese              | 33  | 11           | 0.9                | 0.4, 2.1            | 89    | 45           | 1.8             | 1.0, 3.0 |

\* Subjects who recovered within a month or had recurrent or continuous low back pain during the preceding 12 months compared with those with no pain or who recovered within a week.

† Normal, waist circumference <94 cm for men and <80 cm for women; increased, waist circumference 94–101.9 cm for men and 80–87.9 cm for women; obese, waist circumference ≥102 cm for men and ≥88 cm for women.

‡ OR, odds ratio; CI, confidence interval.

§ Adjusted for age, socioeconomic status, and smoking. Separate and joint effects of increased waist circumference and C-reactive protein were also adjusted for leptin level.

## ACKNOWLEDGMENTS

This study was financially supported by the Academy of Finland (grants 77841 and 201888), the Social Insurance Institution of Finland, government grants to Tampere and Turku University Hospitals, the Turku University Foundation, the Juho Vainio Foundation, the Finnish Foundation of Cardiovascular Research, the Lydia Maria Julin Foundation, Research Foundation of Orion Corporation, and the Finnish Cultural Foundation.

Conflict of interest: none declared.

## REFERENCES

1. Strine TW, Hootman JM. US national prevalence and correlates of low back and neck pain among adults. *Arthritis Rheum* 2007;57:656–65.
2. Hemingway H, Shipley M, Stansfeld S, et al. Are risk factors for atherothrombotic disease associated with back pain sickness absence? The Whitehall II Study. *J Epidemiol Community Health* 1999;53:197–203.
3. Webb R, Brammah T, Lunt M, et al. Prevalence and predictors of intense, chronic, and disabling neck and back pain in the UK general population. *Spine* 2003;28:1195–202.
4. Meerding WJ, IJzelenberg W, Koopmanschap MA, et al. Health problems lead to considerable productivity loss at work among workers with high physical load jobs. *J Clin Epidemiol* 2005;58:517–23.
5. Schneider S, Randoll D, Buchner M. Why do women have back pain more than men? A representative prevalence study in the federal republic of Germany. *Clin J Pain* 2006;22:738–47.
6. Wijnhoven HA, de Vet HC, Picavet HS. Prevalence of musculoskeletal disorders is systematically higher in women than in men. *Clin J Pain* 2006;22:717–24.
7. Pengel LH, Herbert RD, Maher CG, et al. Acute low back pain: systematic review of its prognosis. *BMJ* 2003;327:323.
8. Haslam DW, James WP. Obesity. *Lancet* 2005;366:1197–209.
9. Leboeuf-Yde C. Body weight and low back pain. A systematic literature review of 56 journal articles reporting on 65 epidemiologic studies. *Spine* 2000;25:226–37.
10. Deyo RA, Bass JE. Lifestyle and low-back pain. The influence of smoking and obesity. *Spine* 1989;14:501–6.
11. Lake JK, Power C, Cole TJ. Back pain and obesity in the 1958 British birth cohort. Cause or effect? *J Clin Epidemiol* 2000;53:245–50.
12. Heliövaara M, Mäkelä M, Knekt P, et al. Determinants of sciatica and low-back pain. *Spine* 1991;16:608–14.
13. Power C, Frank J, Hertzman C, et al. Predictors of low back pain onset in a prospective British study. *Am J Public Health* 2001;91:1671–8.

14. Croft PR, Papageorgiou AC, Thomas E, et al. Short-term physical risk factors for new episodes of low back pain. Prospective evidence from the South Manchester Back Pain Study. *Spine* 1999;24:1556–61.
15. Lean ME, Han TS, Seidell JC. Impairment of health and quality of life in people with large waist circumference. *Lancet* 1998;351:853–6.
16. Symmons DP, van Hemert AM, Vandenbroucke JP, et al. A longitudinal study of back pain and radiological changes in the lumbar spines of middle aged women. II. Radiographic findings. *Ann Rheum Dis* 1991;50:162–6.
17. Jhawar BS, Fuchs CS, Colditz GA, et al. Cardiovascular risk factors for physician-diagnosed lumbar disc herniation. *Spine J* 2006;6:684–91.
18. Liuke M, Solovieva S, Lamminen A, et al. Disc degeneration of the lumbar spine in relation to overweight. *Int J Obes (Lond)* 2005;29:903–8.
19. Adams MA, Roughley PJ. What is intervertebral disc degeneration, and what causes it? *Spine* 2006;31:2151–61.
20. Burke JG, Watson RW, McCormack D, et al. Intervertebral discs which cause low back pain secrete high levels of proinflammatory mediators. *J Bone Joint Surg Br* 2002;84:196–201.
21. Le Gars L, Borderie D, Kaplan G, et al. Systemic inflammatory response with plasma C-reactive protein elevation in disk-related lumbosciatic syndrome. *Joint Bone Spine* 2000;67:452–5.
22. Rosen ED, Spiegelman BM. Adipocytes as regulators of energy balance and glucose homeostasis. *Nature* 2006;444:847–53.
23. Kutlu S, Canpolat S, Sandal S, et al. Effects of central and peripheral administration of leptin on pain threshold in rats and mice. *Neuro Endocrinol Lett* 2003;24:193–6.
24. Shiri R, Karppinen J, Leino-Arjas P, et al. Cardiovascular and lifestyle risk factors in lumbar radicular pain or clinically defined sciatica: a systematic review. *Eur Spine J* 2007;16:2043–54.
25. Gebhardt K, Brenner H, Sturmer T, et al. The course of high-sensitive C-reactive protein in correlation with pain and clinical function in patients with acute lumbosciatic pain and chronic low back pain—a 6 months prospective longitudinal study. *Eur J Pain* 2006;10:711–19.
26. Åkerblom HK, Viikari J, Uhari M, et al. Atherosclerosis precursors in Finnish children and adolescents. I. General description of the cross-sectional study of 1980, and an account of the children's and families' state of health. *Acta Paediatr Scand Suppl* 1985;318:49–63.
27. Juonala M, Viikari JS, Hutri-Kähönen N, et al. The 21-year follow-up of the Cardiovascular Risk in Young Finns Study: risk factor levels, secular trends and east-west difference. *J Intern Med* 2004;255:457–68.
28. Porkka KV, Raitakari OT, Leino A, et al. Trends in serum lipid levels during 1980–1992 in children and young adults: The Cardiovascular Risk in Young Finns Study. *Am J Epidemiol* 1997;146:64–77.
29. Dunn KM, Jordan K, Croft PR. Characterizing the course of low back pain: a latent class analysis. *Am J Epidemiol* 2006;163:754–61.
30. Linnet KM, Wisborg K, Agerbo E, et al. Gestational age, birth weight, and the risk of hyperkinetic disorder. *Arch Dis Child* 2006;91:655–60.
31. Cole TJ, Bellizzi MC, Flegal KM, et al. Establishing a standard definition for child overweight and obesity worldwide: international survey. *BMJ* 2000;320:1240–3.
32. National Institute for Health and Clinical Excellence (NICE). Obesity: the prevention, identification, assessment and management of overweight and obesity in adults and children. London, United Kingdom: NICE, 2006. ([www.nice.org.uk/guidance/CG43](http://www.nice.org.uk/guidance/CG43)).
33. James PT, Leach R, Kalamara E, et al. The worldwide obesity epidemic. *Obes Res* 2001;9(suppl 4):228S–33S.
34. Croft JB, Keenan NL, Sheridan DP, et al. Waist-to-hip ratio in a biracial population: measurement, implications, and cautions for using guidelines to define high risk for cardiovascular disease. *J Am Diet Assoc* 1995;95:60–4.
35. Juonala M, Viikari JS, Rönkämaa T, et al. Childhood C-reactive protein in predicting CRP and carotid intima-media thickness in adulthood: the Cardiovascular Risk in Young Finns Study. *Arterioscler Thromb Vasc Biol* 2006;26:1883–8.
36. Pesonen E, Viikari J, Räsänen L, et al. Nutritional and genetic contributions to serum cholesterol concentration in a children's follow-up study. *Acta Paediatr* 1994;83:378–82.
37. Ridker PM, Hennekens CH, Buring JE, et al. C-reactive protein and other markers of inflammation in the prediction of cardiovascular disease in women. *N Engl J Med* 2000;342:836–43.
38. Wedderkopp N, Andersen LB, Froberg K, et al. Back pain reporting in young girls appears to be puberty-related. *BMC Musculoskelet Disord* 2005;6:52.
39. Vikat A, Rimpelä M, Salminen JJ, et al. Neck or shoulder pain and low back pain in Finnish adolescents. *Scand J Public Health* 2000;28:164–73.
40. Wijnhoven HA, de Vet HC, Smit HA, et al. Hormonal and reproductive factors are associated with chronic low back pain and chronic upper extremity pain in women—the MORGEN study. *Spine* 2006;31:1496–502.
41. Jia WP, Lu JX, Xiang KS, et al. Prediction of abdominal visceral obesity from body mass index, waist circumference and waist-hip ratio in Chinese adults: receiver operating characteristic curves analysis. *Biomed Environ Sci* 2003;16:206–11.
42. Snijder MB, van Dam RM, Visser M, et al. What aspects of body fat are particularly hazardous and how do we measure them? *Int J Epidemiol* 2006;35:83–92.
43. Han TS, Schouten JS, Lean ME, et al. The prevalence of low back pain and associations with body fatness, fat distribution and height. *Int J Obes Relat Metab Disord* 1997;21:600–7.
44. Mirtz TA, Greene L. Is obesity a risk factor for low back pain? An example of using the evidence to answer a clinical question. *Chiropr Osteopat* 2005;13:2.
45. Raitakari M, Mansikkaniemi K, Marniemi J, et al. Distribution and determinants of serum high-sensitive C-reactive protein in a population of young adults: the Cardiovascular Risk in Young Finns Study. *J Intern Med* 2005;258:428–34.
